# Supplementary material
Source: PubMed Central journal article supplement (PMC2670581)

**Supplemental Figure 1.** Genes not regulated by R1881 that are regulated with SOD2

knockdown (shSOD2) with expression changes reversed with NAC treatment (NAC). Estrogen receptor-alpha (ESR1), estrogen related receptor-beta, progesterone receptor (PGR) and RXR-alpha are all regulated discordantly with SOD2 knockdown and treatment with NAC.

Sharifi, et al.  
Supplemental Figure 1

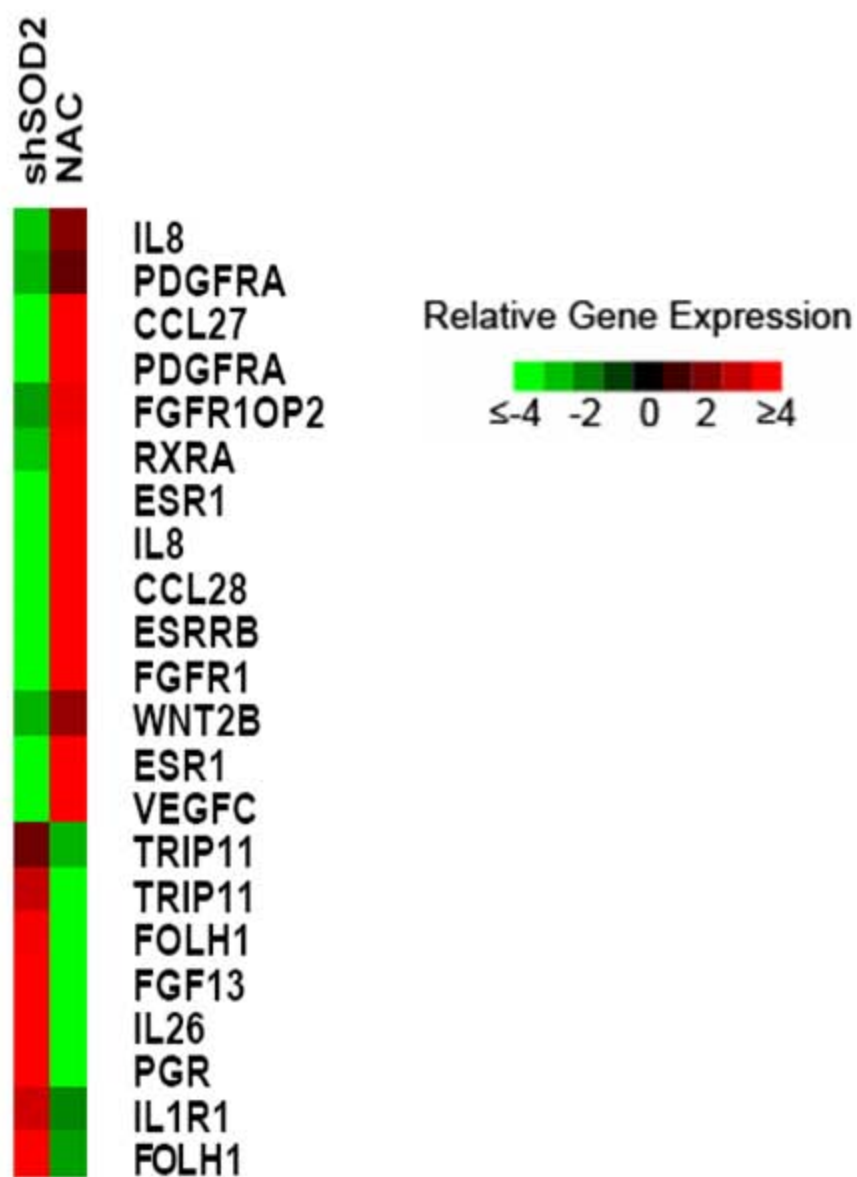

Supplement: NIHMS56887-supplement-01.pdf [file NIHMS56887-supplement-01.pdf]
